# Supplementary material for: Steroidogenic control of liver metabolism through a nuclear receptor-network
Source: PubMed Central journal article supplement (PMC6819870; doi:10.1016/j.molmet.2019.09.007), 2019-09-30
Supplement: mmc1.pdf [file mmc1.pdf]

## Supplemental Table 1

| <b>Gene Name</b> | <b>Fold Change</b> |
|------------------|--------------------|
| Cyp17a1          | +83                |
| Apo19b           | +2.3               |
| PPARa            | +2.1               |
| Hpd              | +1.8               |
| Gstm             | +1.8               |
| Me1              | +1.8               |
| Fabp2            | +1.7               |
| Cyp4a12          | +1.6               |
| Sdr39u1          | +1.6               |
| Acss2            | +1.5               |
| Herpud1          | -1.5               |
| Hsd17b6          | -1.5               |
| Cf1              | -1.5               |
| Cd44             | -1.5               |
| Tat              | -1.7               |
| Hmgcr            | -1.7               |
| Fgl1             | -3.1               |
| Tlcd2            | -3.7               |
