# Supplementary material for: Steroidogenic control of liver metabolism through a nuclear receptor-network
Source: PubMed Central journal article supplement (PMC6819870; doi:10.1016/j.molmet.2019.09.007), 2019-09-30

Supplemental Figure 2

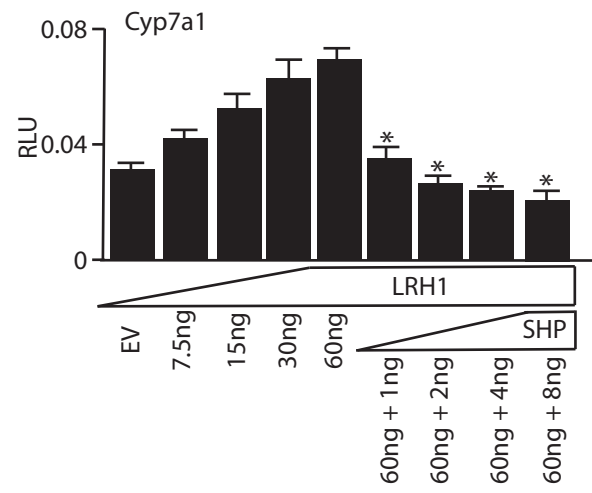

Supplement: mmc3.pdf [file mmc3.pdf]
